# Supplementary material for: Evaluation of Everyday Living Areas for Deinstitutionalized Community-Living People with Mental Illness
Source: MDPI journal article supplement (doi:10.3390/challe14030030), 2023-06-26
Supplement: s1 [file s1]

**Table S1.** Number of PHs, DCs, and SCEBs by ELA obtained using simulation ( $n=49$ ).

| ELA ID | Psychiatric hospital |                   |   | Daycare center   |                   |   | Support office for continuous employment type B |                   |    |
|--------|----------------------|-------------------|---|------------------|-------------------|---|-------------------------------------------------|-------------------|----|
|        | Walking (5 km/h)     | Cycling (11 km/h) |   | Walking (5 km/h) | Cycling (11 km/h) |   | Walking (5 km/h)                                | Cycling (11 km/h) |    |
| 1      | 0                    |                   | 2 | 0                |                   | 2 | 4                                               |                   | 6  |
| 2      | 0                    |                   | 2 | 0                |                   | 2 | 0                                               |                   | 2  |
| 3      | 0                    |                   | 0 | 0                |                   | 0 | 3                                               |                   | 4  |
| 4      | 1                    |                   | 1 | 1                |                   | 1 | 2                                               |                   | 2  |
| 5      | 1                    |                   | 1 | 1                |                   | 1 | 0                                               |                   | 2  |
| 6      | 0                    |                   | 0 | 0                |                   | 0 | 0                                               |                   | 0  |
| 7      | 1                    |                   | 1 | 1                |                   | 1 | 2                                               |                   | 2  |
| 8      | 0                    |                   | 1 | 0                |                   | 1 | 1                                               |                   | 1  |
| 9      | 0                    |                   | 1 | 0                |                   | 1 | 3                                               |                   | 7  |
| 10     | 1                    |                   | 1 | 1                |                   | 1 | 2                                               |                   | 7  |
| 11     | 0                    |                   | 0 | 0                |                   | 0 | 0                                               |                   | 0  |
| 12     | 0                    |                   | 0 | 0                |                   | 0 | 2                                               |                   | 3  |
| 13     | 1                    |                   | 1 | 1                |                   | 1 | 1                                               |                   | 6  |
| 14     | 1                    |                   | 1 | 1                |                   | 1 | 1                                               |                   | 2  |
| 15     | 1                    |                   | 1 | 1                |                   | 1 | 2                                               |                   | 3  |
| 16     | 1                    |                   | 1 | 1                |                   | 1 | 0                                               |                   | 3  |
| 17     | 0                    |                   | 1 | 0                |                   | 1 | 1                                               |                   | 3  |
| 18     | 0                    |                   | 0 | 0                |                   | 0 | 1                                               |                   | 1  |
| 19     | 1                    |                   | 1 | 1                |                   | 1 | 0                                               |                   | 3  |
| 20     | 4                    |                   | 8 | 4                |                   | 8 | 23                                              |                   | 42 |
| 21     | 1                    |                   | 1 | 1                |                   | 1 | 0                                               |                   | 3  |
| 22     | 0                    |                   | 0 | 0                |                   | 0 | 3                                               |                   | 3  |
| 23     | 3                    |                   | 8 | 3                |                   | 8 | 20                                              |                   | 39 |
| 24     | 3                    |                   | 8 | 3                |                   | 8 | 20                                              |                   | 39 |
| 25     | 4                    |                   | 8 | 4                |                   | 8 | 13                                              |                   | 40 |
| 26     | 6                    |                   | 8 | 6                |                   | 8 | 18                                              |                   | 41 |
| 27     | 6                    |                   | 8 | 6                |                   | 8 | 18                                              |                   | 42 |
| 28     | 4                    |                   | 8 | 4                |                   | 8 | 11                                              |                   | 40 |
| 29     | 1                    |                   | 1 | 1                |                   | 1 | 4                                               |                   | 13 |
| 30     | 2                    |                   | 9 | 2                |                   | 9 | 15                                              |                   | 43 |

|                                                      |      |      |      |      |      |     |
|------------------------------------------------------|------|------|------|------|------|-----|
| 31                                                   | 0    | 1    | 0    | 1    | 3    | 9   |
| 32                                                   | 0    | 5    | 0    | 5    | 6    | 19  |
| 33                                                   | 1    | 1    | 1    | 1    | 5    | 14  |
| 34                                                   | 0    | 1    | 0    | 1    | 3    | 8   |
| 35                                                   | 3    | 8    | 3    | 8    | 16   | 38  |
| 36                                                   | 6    | 8    | 6    | 8    | 13   | 39  |
| 37                                                   | 6    | 8    | 6    | 8    | 17   | 42  |
| 38                                                   | 0    | 2    | 0    | 2    | 2    | 11  |
| 39                                                   | 0    | 0    | 0    | 0    | 1    | 2   |
| 40                                                   | 5    | 8    | 5    | 8    | 17   | 40  |
| 41                                                   | 0    | 4    | 0    | 4    | 2    | 22  |
| 42                                                   | 1    | 1    | 1    | 1    | 5    | 14  |
| 43                                                   | 5    | 8    | 5    | 8    | 20   | 44  |
| 44                                                   | 5    | 8    | 5    | 8    | 20   | 40  |
| 45                                                   | 4    | 8    | 4    | 8    | 17   | 37  |
| 46                                                   | 5    | 8    | 5    | 8    | 19   | 39  |
| 47                                                   | 0    | 5    | 0    | 5    | 2    | 26  |
| 48                                                   | 5    | 8    | 5    | 8    | 20   | 41  |
| 49                                                   | 5    | 8    | 5    | 8    | 21   | 41  |
| <hr/>                                                |      |      |      |      |      |     |
| Percentage<br>of ELAs<br>without<br>resources<br>(%) | 36.7 | 14.3 | 36.7 | 14.3 | 14.3 | 4.1 |

---

ELAs that could be reached within 30 min on foot or by bicycle from the center of the GH were determined, and the number of PHs, DCs, and SCEBs within each ELA was counted. ELAs with no social resources are grayed out. ELA, everyday living area; GH, group home; PH, psychiatric hospital; DC, daycare center; SCEB, support office for continuous employment type B.
